# Supplementary material
Source: PubMed Central journal article supplement (PMC1203373)
Supplement: plntphys_pp.105.066811_1.pdf [file plntphys_pp.105.066811_1.pdf]

**Supplementary Fig. 1.** Virus-induced gene silencing (VIGS) of *CH42*. Albino leaves are newly emerged tissue in which the *CH42* gene is silenced.
